# Supplementary material for: RNase L Induces Expression of A Novel Serine/Threonine Protein Kinase, DRAK1, to Promote Apoptosis
Source: MDPI journal article supplement (doi:10.3390/ijms20143535), 2019-07-19
Supplement: s1 [file s1]

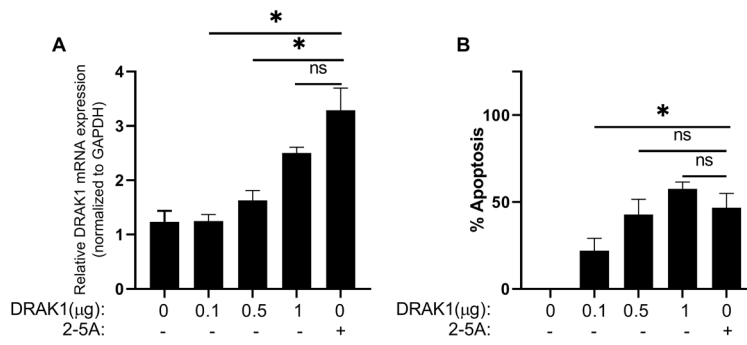

**Supplementary Figure 1.** PC3 cells were transfected with increasing amounts of DRAK1 plasmid or 10  $\mu$ M of 2-5A. (A) After 24 h, the levels of DRAK1 mRNA were measured by RT-PCR using DRAK1-specific primers and normalized to GAPDH mRNA levels, or (B) Apoptosis % was determined by trypan blue exclusion. Data shown are mean values  $\pm$  SD from experiment performed in triplicate. Student's *t* test was used to determine *p* values. \**p* < 0.01, not significant (ns).
